# Supplementary material
Source: PubMed Central journal article supplement (PMC4186512)
Supplement: CJN.03410414_CJN03410414SupplementaryData.pdf [file CJN.03410414_CJN03410414SupplementaryData.pdf]

Filling the Holes in Cystic Kidney Disease Research  
Author contact, affiliation and disclosure information

Lisa M. Guay-Woodford, MD  
Hudson Professor of Pediatrics  
Associate VP for Clinical and Translational Research  
The George Washington University  
Director, Center for Translational Science  
Director, CTSI-CN  
Children's National Health System  
6th Floor Main Hospital, Center 6  
111 Michigan Ave NW |  
Washington, DC 20010  
Tel: 202-476-6439  
Email: [LGuaywoo@childrensnational.org](mailto:LGuaywoo@childrensnational.org)

Disclosure: Consultant for Otsuka Pharmaceuticals

Elizabeth Henske, MD  
Professor of Medicine  
Brigham and Women's Hospital, Harvard Medical School  
Department of Medicine  
Boston MA 02115  
Phone: 617 355 9049  
Email: [ehenske@partners.org](mailto:ehenske@partners.org)

Peter Igarashi, MD  
Professor of Internal Medicine and Pediatrics; Chief, Division of Nephrology  
University of Texas Southwestern Medical Center  
Depts. of Internal Medicine and Pediatrics  
Dallas, TX, 75390-8856  
Phone: (214) 648-2754  
Email: [peter.igarashi@utsouthwestern.edu](mailto:peter.igarashi@utsouthwestern.edu)

Disclosures:  
Stock ownership (<\$10,000 each): Teva Pharmaceuticals, CVS Caremark, Johnson & Johnson  
Royalties: Elsevier  
Honoraria/Consulting: Southern Society for Clinical Investigation, PKD Foundation

Ronald D Perrone, MD  
Associate Chief, Division Of Nephrology  
Tufts Medical Center  
Department Of Medicine/Nephrology  
Boston, MA 02111  
Phone: 617-636-0563  
Email: [rperrone@tuftsmedicalcenter.org](mailto:rperrone@tuftsmedicalcenter.org)

Disclosures:

OTSUKA: RESEARCH SUPPORT, CONSULTANT  
SANOFI-GENZYME: CONSULTANT  
VERTEX: CONSULTANT

Berenice Reed-Gitomer, PhD  
Associate Professor of Medicine  
University of Colorado Anschutz Medical Campus  
Department of Medicine/Renal Diseases and Hypertension  
Aurora, CO, 80045  
Phone: 303 724 1685  
Email: [berenice.gitomer@ucdenver.edu](mailto:berenice.gitomer@ucdenver.edu)

Stefan Somlo, MD  
Professor  
Yale School of Medicine  
Department of Medicine/Nephrology  
New Haven, CT 06520  
Phone: 203-737-2974  
Email: [stefan.somlo@yale.edu](mailto:stefan.somlo@yale.edu)

Vicente E Torres, MD, PhD  
Professor of Medicine  
Mayo Clinic  
Department of Nephrology and Hypertension  
Rochester, MN 55905  
Phone: (507) 266-7093  
Email: [torres.vicente@mayo.edu](mailto:torres.vicente@mayo.edu)  
Disclosure: Received research support from Otsuka Pharmaceutical

Christian J. Ketchum, Ph.D.  
National Institutes of Health, NIDDK  
Division of Kidney, Urology and Hematology (KUH)  
Two Democracy Plaza, Room #647  
6707 Democracy Blvd., MSC 5458  
Bethesda, MD 20892-5458  
Phone: 301-402-1411  
Fax: 301-480-3510  
Email: [chrisketchum@nih.gov](mailto:chrisketchum@nih.gov)

Robert A Star, MD  
National Institutes of Health, NIDDK  
Division of Kidney, Urology and Hematology (KUH)  
Two Democracy Plaza, Room #647  
6707 Democracy Blvd., MSC 5458  
Bethesda, MD 20892-5458  
Phone: 301-402-1411  
Fax: 301-480-3510  
Email: [starr@niddk.nih.gov](mailto:starr@niddk.nih.gov)

Michael F. Flessner, MD, PhD  
National Institutes of Health, NIDDK  
Division of Kidney, Urology and Hematology (KUH)  
Two Democracy Plaza, Room #647  
6707 Democracy Blvd., MSC 5458  
Bethesda, MD 20892-5458  
Phone: 301-402-1411  
Fax: 301-480-3510  
Email: [flessnermf@niddk.nih.gov](mailto:flessnermf@niddk.nih.gov)

Rebekah S Rasooly  
National Institutes of Health, NIDDK  
Division of Kidney, Urology and Hematology (KUH)  
Two Democracy Plaza, Room #647  
6707 Democracy Blvd., MSC 5458  
Bethesda, MD 20892-5458  
Phone: 301-402-1411  
Fax: 301-480-3510  
Email: [rr185i@nih.gov](mailto:rr185i@nih.gov)
